# Supplementary material for: Strong genetic structure corresponds to small-scale geographic breaks in the Australian alpine grasshopper Kosciuscola tristis
Source: PubMed Central journal article supplement (PMC4203917; doi:10.1186/s12862-014-0204-1), 2014-10-02
Supplement: 12862_2014_204_MOESM1_ESM.pdf [file 12862_2014_204_MOESM1_ESM.pdf]

## Additional file 1.

**Table 1S.** Sampling locations and sample sizes for *COI*, *ITS1* and microsatellite analyses.

| <b>Location</b>          | <b>Latitude</b> | <b>Longitude</b> | <b>Elevation<br/>(m a.s.l)</b> | <b><i>COI/ITS1</i><br/>sample size</b> | <b>Microsatellites<br/>sample size</b> |
|--------------------------|-----------------|------------------|--------------------------------|----------------------------------------|----------------------------------------|
| <i>Kosciuszko region</i> |                 |                  |                                |                                        |                                        |
| Mt Jagungal              | -36.1481°       | 148.3875°E       | 2054                           | 5                                      | 31                                     |
| Mt Tate                  | -36.3726°       | 148.3652°E       | 1671                           | 5                                      | 29                                     |
| Guthega                  | -36.3843°       | 148.3764°E       | 1698                           | 5                                      | 30                                     |
| Mt Townsend              | -36.4225°       | 148.2588°E       | 2205                           | 5                                      | 0                                      |
| Thredbo 1                | -36.5015°       | 148.2728°E       | 1901                           | 5                                      | 29                                     |
| Thredbo 2                | -36.5093°       | 148.2694°E       | 1781                           | 0                                      | 30                                     |
| Thredbo 3                | -36.5173°       | 148.2647°E       | 1681                           | 0                                      | 30                                     |
|                          |                 |                  |                                |                                        |                                        |
| <i>Victoria</i>          |                 |                  |                                |                                        |                                        |
| Mt Bogong                | -36.7559°       | 147.3266°E       | 1791                           | 5                                      | 30                                     |
| Mt Nelse                 | -36.8434°       | 147.3445°E       | 1805                           | 5                                      | 0                                      |
| Falls Creek              | -36.8700°       | 147.2777°E       | 1744                           | 5                                      | 30                                     |
| Mt Cope                  | -36.9272°       | 147.2812°E       | 1781                           | 5                                      | 29                                     |
| Mt Jaithmathang          | -36.8903°       | 147.1923°E       | 1844                           | 5                                      | 0                                      |
| Mt Hotham                | -36.9890°       | 147.1470°E       | 1782                           | 5                                      | 0                                      |
| Mt Buffalo               | -36.7553°       | 146.7914°E       | 1536                           | 5                                      | 29                                     |
| Mt Buller                | -37.1455°       | 146.4308°E       | 1774                           | 5                                      | 30                                     |
| Mt Stirling              | -37.1216°       | 146.4989°E       | 1627                           | 5                                      | 30                                     |
| Mt Baw Baw               | -37.8335°       | 146.3081°E       | 1476                           | 5                                      | 29                                     |
