# Supplementary material for: Strong genetic structure corresponds to small-scale geographic breaks in the Australian alpine grasshopper Kosciuscola tristis
Source: PubMed Central journal article supplement (PMC4203917; doi:10.1186/s12862-014-0204-1), 2014-10-02
Supplement: 12862_2014_204_MOESM2_ESM.pdf [file 12862_2014_204_MOESM2_ESM.pdf]

## Additional file 2. Population- and locus-specific allele frequencies

**Table 2S.** Average population-specific null allele frequencies

| Population                | Null allele frequency |      |
|---------------------------|-----------------------|------|
|                           | mean                  | SD   |
| <i>Five-locus dataset</i> |                       |      |
| Thredbo 1                 | 0.12                  | 0.08 |
| Thredbo 2                 | 0.11                  | 0.10 |
| Thredbo 3                 | 0.09                  | 0.09 |
| Guthega                   | 0.12                  | 0.11 |
| Jagungal                  | 0.10                  | 0.12 |
| Tate                      | 0.12                  | 0.11 |
| Buffalo                   | 0.21                  | 0.09 |
| Bogong                    | 0.20                  | 0.13 |
| Cope                      | 0.20                  | 0.10 |
| Falls Creek               | 0.19                  | 0.07 |
| Buller                    | 0.19                  | 0.10 |
| Stirling                  | 0.18                  | 0.09 |
| Baw Baw                   | 0.19                  | 0.14 |
|                           |                       |      |
| <i>Kosciuszko dataset</i> |                       |      |
| Thredbo 1                 | 0.16                  | 0.07 |
| Thredbo 2                 | 0.20                  | 0.07 |
| Thredbo 3                 | 0.17                  | 0.12 |
| Guthega                   | 0.21                  | 0.12 |
| Tate                      | 0.19                  | 0.12 |
| Jagungal                  | 0.20                  | 0.11 |

**Table 3S.** Average locus-specific null allele frequencies.

| Locus                     | Null allele frequency |      |
|---------------------------|-----------------------|------|
|                           | mean                  | SD   |
| <i>Five-locus dataset</i> |                       |      |
| Ktr29                     | 0.09                  | 0.03 |
| Ktr76                     | 0.04                  | 0.05 |
| Ktr73                     | 0.18                  | 0.04 |

|                           |      |       |
|---------------------------|------|-------|
| Ktr82                     | 0.18 | 0.08  |
| Ktr58                     | 0.20 | 0.08  |
| Ktr88                     | 0.30 | 0.03  |
| Ktr30                     | 0.25 | 0.06  |
| Ktr60                     | 0.30 | 0.05  |
|                           |      |       |
| <i>Kosciuszko dataset</i> |      |       |
| Ktr29                     | 0.05 | 0.04  |
| Ktr76                     | 0.12 | 0.10  |
| Ktr58                     | 0.14 | 0.080 |
| Ktr88                     | 0.30 | 0.05  |
| Ktr30                     | 0.17 | 0.07  |
