# Supplementary material for: Strong genetic structure corresponds to small-scale geographic breaks in the Australian alpine grasshopper Kosciuscola tristis
Source: PubMed Central journal article supplement (PMC4203917; doi:10.1186/s12862-014-0204-1), 2014-10-02
Supplement: 12862_2014_204_MOESM3_ESM.pdf [file 12862_2014_204_MOESM3_ESM.pdf]

**Additional file 3. Pairwise  $F_{ST}$  and  $F'_{ST}$  matrices for microsatellite data.**

**Table 4S.** Pairwise  $F_{ST}$  (below diagonal) and  $F'_{ST}$  (above diagonal) matrices for the 5-locus dataset.  $F_{ST}$  values were corrected for null alleles with the ENA method (Chapuis & Estoup 2007). Stastical significance was tested for  $F_{ST}$  values, using 1000 bootstrap iterations and corrected for multiple comparisons using the False Discovery Rates method. All pairwise differences are statistically significant ( $p < 0.05$ ) except those in bold.

|           | Buffalo | Bogong | Cope         | Falls | Baw Baw | Buller       | Stirling | Guthega | Jagungal | Tate         | Thredbo 1 | Thredbo 2 | Thredbo 3 |
|-----------|---------|--------|--------------|-------|---------|--------------|----------|---------|----------|--------------|-----------|-----------|-----------|
| Buffalo   |         | 0.535  | 0.484        | 0.497 | 0.408   | 0.38         | 0.568    | 0.456   | 0.561    | 0.469        | 0.524     | 0.495     | 0.515     |
| Bogong    | 0.079   |        | 0.172        | 0.227 | 0.456   | 0.432        | 0.284    | 0.643   | 0.623    | 0.556        | 0.514     | 0.485     | 0.636     |
| Cope      | 0.093   | 0.015  |              | 0     | 0.295   | 0.309        | 0.355    | 0.402   | 0.540    | 0.344        | 0.388     | 0.364     | 0.433     |
| Falls     | 0.083   | 0.013  | <b>0.002</b> |       | 0.424   | 0.313        | 0.327    | 0.422   | 0.401    | 0.384        | 0.397     | 0.321     | 0.434     |
| Baw Baw   | 0.108   | 0.050  | 0.057        | 0.056 |         | 0.207        | 0.249    | 0.357   | 0.485    | 0.34         | 0.508     | 0.419     | 0.503     |
| Buller    | 0.070   | 0.044  | 0.039        | 0.035 | 0.047   |              | 0.112    | 0.571   | 0.505    | 0.516        | 0.585     | 0.527     | 0.555     |
| Stirling  | 0.077   | 0.036  | 0.043        | 0.034 | 0.055   | <b>0.010</b> |          | 0.657   | 0.559    | 0.573        | 0.644     | 0.549     | 0.672     |
| Guthega   | 0.156   | 0.083  | 0.057        | 0.057 | 0.118   | 0.102        | 0.109    |         | 0.414    | 0.028        | 0.112     | 0.095     | 0.074     |
| Jagungal  | 0.148   | 0.080  | 0.066        | 0.056 | 0.111   | 0.093        | 0.096    | 0.059   |          | 0.409        | 0.463     | 0.376     | 0.427     |
| Tate      | 0.158   | 0.081  | 0.056        | 0.059 | 0.108   | 0.099        | 0.100    | 0.010   | 0.064    |              | 0.189     | 0.117     | 0.15      |
| Thredbo 1 | 0.160   | 0.079  | 0.062        | 0.060 | 0.127   | 0.106        | 0.110    | 0.013   | 0.068    | 0.027        |           | 0.023     | 0.085     |
| Thredbo 2 | 0.149   | 0.067  | 0.049        | 0.047 | 0.105   | 0.089        | 0.092    | 0.015   | 0.055    | <b>0.014</b> | 0.005     |           | 0.022     |
| Thredbo 3 | 0.172   | 0.096  | 0.068        | 0.070 | 0.137   | 0.112        | 0.121    | 0.007   | 0.069    | 0.021        | 0.012     | 0.008     |           |

**Table 5S.** Pairwise  $F_{ST}$  (below diagonal) and  $F'_{ST}$  (above diagonal) matrices for the Kosciuszko dataset.  $F_{ST}$  values were corrected for null alleles with the ENA method (Chapuis & Estoup 2007). Stastical significance was tested for  $F_{ST}$  values, using 1000 bootstrap iterations and corrected for multiple comparisons using the False Discovery Rates method. All pairwise differences are statistically significant ( $p < 0.05$ ) except those in bold.

|                  | <b>Guthega</b> | <b>Jagungal</b> | <b>Tate</b> | <b>Thredbo 1</b> | <b>Thredbo 2</b> | <b>Thredbo 3</b> |
|------------------|----------------|-----------------|-------------|------------------|------------------|------------------|
| <b>Guthega</b>   |                | 0.312           | 0.048       | 0.162            | 0.123            | 0.144            |
| <b>Jagungal</b>  | 0.048          |                 | 0.307       | 0.326            | 0.291            | 0.298            |
| <b>Tate</b>      | 0.011          | 0.044           |             | 0.166            | 0.079            | 0.181            |
| <b>Thredbo 1</b> | 0.029          | 0.065           | 0.031       |                  | 0.017            | 0.106            |
| <b>Thredbo 2</b> | 0.023          | 0.048           | 0.013       | <b>0.002</b>     |                  | 0.057            |
| <b>Thredbo 3</b> | 0.023          | 0.055           | 0.028       | 0.018            | <b>0.013</b>     |                  |
