# Supplementary material for: Strong genetic structure corresponds to small-scale geographic breaks in the Australian alpine grasshopper Kosciuscola tristis
Source: PubMed Central journal article supplement (PMC4203917; doi:10.1186/s12862-014-0204-1), 2014-10-02
Supplement: 12862_2014_204_MOESM4_ESM.pdf [file 12862_2014_204_MOESM4_ESM.pdf]

#### Additional file 4.

**Table 6S.** Details of reagent concentrations for polymerase chain reactions to amplify *COI* and *ITS1* sequences.

| Reagent               | PCR concentration    | Volume (ul) in 25 $\mu$ L reaction |
|-----------------------|----------------------|------------------------------------|
| <i>COI</i>            |                      |                                    |
| BSA                   | 0.5 $\mu$ g/ $\mu$ L | 1.25                               |
| MgCl <sub>2</sub>     | 0.75 mM              | 0.75                               |
| 10x Thermo pro buffer | 1 x                  | 2.5                                |
| dNTPs                 | 200 $\mu$ M          | 5                                  |
| Forward primer        | 0.016 $\mu$ M        | 1                                  |
| Reverse primer        | 0.016 $\mu$ M        | 1                                  |
| NEB taq               | 1.25 u               | 0.25                               |
| DNA                   | ~0.7 ng/ $\mu$ L     | 5                                  |
|                       |                      |                                    |
| <i>ITS1</i>           |                      |                                    |
| BSA                   | 0.5 $\mu$ g/ $\mu$ L | 1.25                               |
| MgCl <sub>2</sub>     | 0.75 mM              | 0.75                               |
| 10x Thermo pro buffer | 1 x                  | 2.5                                |
| dNTPs                 | 200 $\mu$ M          | 5                                  |
| Forward primer        | 0.016 $\mu$ M        | 1                                  |
| Reverse primer        | 0.016 $\mu$ M        | 1                                  |
| NEB taq               | 1.25 u               | 0.25                               |
| DNA                   | ~0.7 ng/ $\mu$ L     | 5                                  |
