# Supplementary material for: Strong genetic structure corresponds to small-scale geographic breaks in the Australian alpine grasshopper Kosciuscola tristis
Source: PubMed Central journal article supplement (PMC4203917; doi:10.1186/s12862-014-0204-1), 2014-10-02
Supplement: 12862_2014_204_MOESM5_ESM.pdf [file 12862_2014_204_MOESM5_ESM.pdf]

## Additional file 5. Genbank accession numbers and haplotype assignment

**Table 7S.** Genbank accession numbers for *Kosciuscola tristis* sequences used to construct the *COI* and *ITS1* phylogenies. The collection sites represented by each haplotype, and number of individuals, are also provided.

| Haplotype number | Genbank accession number | Collection site ( <i>N</i> individuals)                                |
|------------------|--------------------------|------------------------------------------------------------------------|
| <i>COI</i>       |                          |                                                                        |
| 1                | KJ870103                 | Mt Bogong (4)<br>Mt Jaithmathang (4)<br>Mt Cope (5)<br>Falls Creek (5) |
| 2                | KJ870104                 | Mt Buller (4)                                                          |
| 3                | KJ870105                 | Thredbo (4)                                                            |
| 4                | KJ870106                 | Mt Jaithmathang (1)                                                    |
| 5                | KJ870107                 | Mt Hotham (2)                                                          |
| 6                | KJ870108                 | Mt Buller (1)                                                          |
| 7                | KJ870109                 | Mt Stirling (5)                                                        |
| 8                | KJ870110                 | Mt Baw Baw (1)                                                         |
| 9                | KJ870111                 | Mt Baw Baw (1)                                                         |
| 10               | KJ870112                 | Mt Baw Baw (3)                                                         |
| 11               | KJ870113                 | Mt Tate (1)                                                            |
| 12               | KJ870114                 | Mt Jagungal (4)                                                        |
| 13               | KJ870115                 | Mt Tate (1)<br>Guthega (2)                                             |
| 14               | KJ870116                 | Thredbo (1)                                                            |
| 15               | KJ870117                 | Mt Tate (1)<br>Guthega (1)                                             |
| 16               | KJ870118                 | Mt Tate (2)                                                            |
| 17               | KJ870119                 | Mt Nelse (1)                                                           |
| 18               | KJ870120                 | Mt Nelse (2)                                                           |
| 19               | KJ870121                 | Mt Bogong (1)                                                          |
| 20               | KJ870122                 | Mt Jagungal (1)                                                        |
| 21               | KJ870123                 | Mt Buffalo (1)                                                         |
| 22               | KJ870124                 | Mt Buffalo (1)                                                         |
| 23               | KJ870125                 | Mt Buffalo (1)                                                         |
| 24               | KJ870126                 | Mt Buffalo (1)                                                         |

|             |          |                                                                                                          |
|-------------|----------|----------------------------------------------------------------------------------------------------------|
| 25          | KJ870127 | Mt Buffalo (1)                                                                                           |
| 26          | KJ870128 | Mt Nelse (1)                                                                                             |
| 27          | KJ870129 | Mt Nelse (1)                                                                                             |
| 28          | KJ870130 | Mt Townsend (2)                                                                                          |
| 29          | KJ870131 | Mt Townsend (2)                                                                                          |
| 30          | KJ870132 | Mt Townsend (1)                                                                                          |
| 31          | KJ870133 | Guthega (1)                                                                                              |
| 32          | KJ870134 | Guthega (1)                                                                                              |
| 33          | KJ870135 | Mt Hotham (1)                                                                                            |
| 34          | KJ870136 | Mt Hotham (1)                                                                                            |
| 39          | KJ870137 | Mt Hotham (1)                                                                                            |
| <i>ITSI</i> |          |                                                                                                          |
| 1           | KJ870139 | Mt Baw Baw (1)                                                                                           |
| 2           | KJ870140 | Mt Baw Baw (1)                                                                                           |
| 3           | KJ870141 | Mt Baw Baw (1)                                                                                           |
| 4           | KJ870142 | Mt Baw Baw (1)                                                                                           |
| 5           | KJ870143 | Mt Baw Baw (1)                                                                                           |
| 6           | KJ870144 | Mt Bogong (4)<br>Mt Buffalo (5)<br>Mt Cope (5)<br>Falls Creek (5)<br>Mt Jaithmathang (5)<br>Mt Nelse (4) |
| 7           | KJ870145 | Mt Buller (5)<br>Mt Hotham (4)<br>Mt Stirling (5)                                                        |
| 8           | KJ870146 | Guthega (1)                                                                                              |
| 9           | KJ870147 | Guthega (4)<br>Mt Jagungal (5)<br>Mt Tate (5)<br>Thredbo (5)<br>Mt Townsend (5)                          |
| 10          | KJ870148 | Mt Nelse                                                                                                 |
| 11          | KJ870149 | Mt Hotham                                                                                                |
